# Supplementary material
Source: publisher figshare collection journal article supplement (https://acs.figshare.com/ndownloader/files/17597063)
Supplement: Supplementary file 1 [file 17597063]

*Supporting information for*

## **Development of a Fluorescent Probe for Measurement of Singlet Oxygen Scavenging Activity of Flavonoids**

Darina Pronin,<sup>†</sup> Saarangan Krishnakumar,<sup>§</sup> Michael Rychlik,<sup>†</sup> Haixia Wu<sup>\*,†,§</sup>  
and Dejian Huang<sup>\*,§</sup>

<sup>†</sup>Department of Chemistry, College of Chemistry and Chemical Engineering, Inner Mongolia University, Hohhot 010021, People's Republic of China

<sup>§</sup>Department of Food Science and Technology, National University of Singapore, 3 Science Drive 3, Singapore 117543, Republic of Singapore

<sup>†</sup>Analytical Food Chemistry, Technical University of Munich, Maximus-von-Imhof-Forum 2, D-85354 Freising, Germany

**\*Corresponding author**

Haixia Wu. E-mail: chmwuhx@imu.edu.cn

Dejian Huang. E-mail: chmhdj@nus.edu.sg

**Table S1.** The final concentration solutions of antioxidants in PBS buffer.

| Antioxidant <sup>a</sup>  | Stock solution mg/mL | Final concentration $\mu\text{g/mL}$  |
|---------------------------|----------------------|---------------------------------------|
| Vitamin C                 | 3.63                 | 5.3 / 24.5 / 62.9 / 126 / 205.5 / 274 |
| Trolox in MeOH            | 2.40                 | 17.5 / 35 / 52.5 / 70 / 87.5 / 95     |
| $\beta$ -Carotene in MeOH | 1.07                 | 5.6 / 56 / 84 / 112 / 140 / 168       |
| Caffeic acid in MeOH      | 0.99                 | 0.5 / 6.1 / 12.3 / 18.3 / 24.5 / 36.7 |
| Epicatechin in DMSO       | 0.96                 | 0.5 / 6.8 / 2.7 / 13.7 / 27.4 / 41.1  |
| Catechin gallate          | 0.19                 | 0.54 / 1.1 / 1.4 / 2.7 / 4.1 / 5.4    |
| Epigallocatechin          | 0.67                 | 0.4 / 0.9 / 1.9 / 4.8 / 13.9 / 19.2   |
| Epigallocatechin galatte  | 0.98                 | 0.2 / 0.3 / 0.5 / 1.1 / 1.4 / 2.2     |
| Myricetin in DMSO         | 0.64                 | 0.4 / 1.3 / 1.8 / 2.7 / 3.6 / 5.5     |
| Quercetin in DMSO         | 0.60                 | 0.9 / 1.7 / 2.1 / 2.3 / 2.6 / 3.5     |
| Kaempferol in DMSO        | 0.57                 | 2.2 / 2.5 / 2.9 / 3.8 / 5.0 / 5.7     |

<sup>a</sup> The following stock solutions were prepared in deionized water, unless otherwise described.

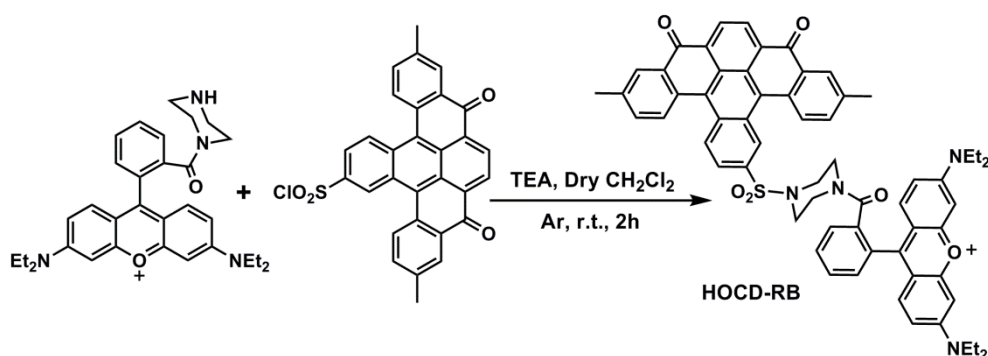

**Scheme S1.** Synthesis of probe HOCD-RB.

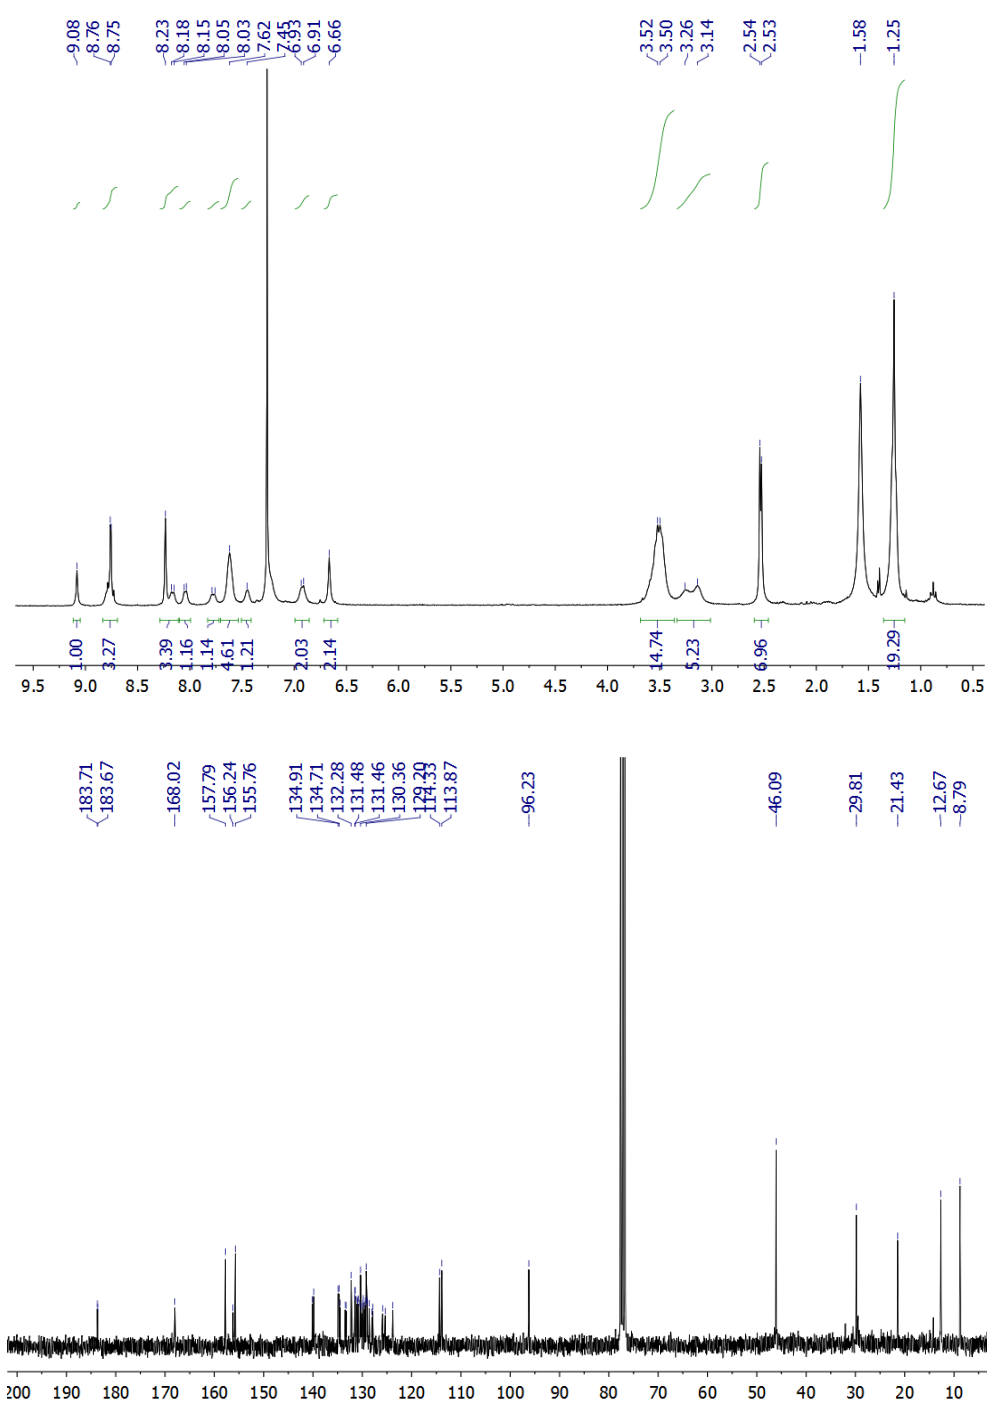

**Figure S1.**  $^1\text{H}$ -NMR and  $^{13}\text{C}$ -NMR spectra of HOCD-RB.

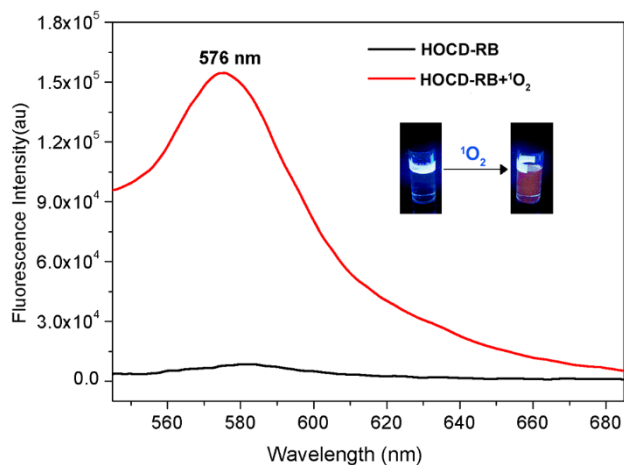

**Figure S2.** The fluorescence emission spectra of HOCD-RB (0.1  $\mu\text{M}$ ) delivered using 20 equiv DOTAP in 10 mM PBS buffer (pH 7.4), in the presence or absence of  $^1\text{O}_2$  for 10 min at r.t. ( $\lambda_{\text{ex}} = 480 \text{ nm}$ ).  $^1\text{O}_2$  is generated by photo-irradiation of rose Bengal.

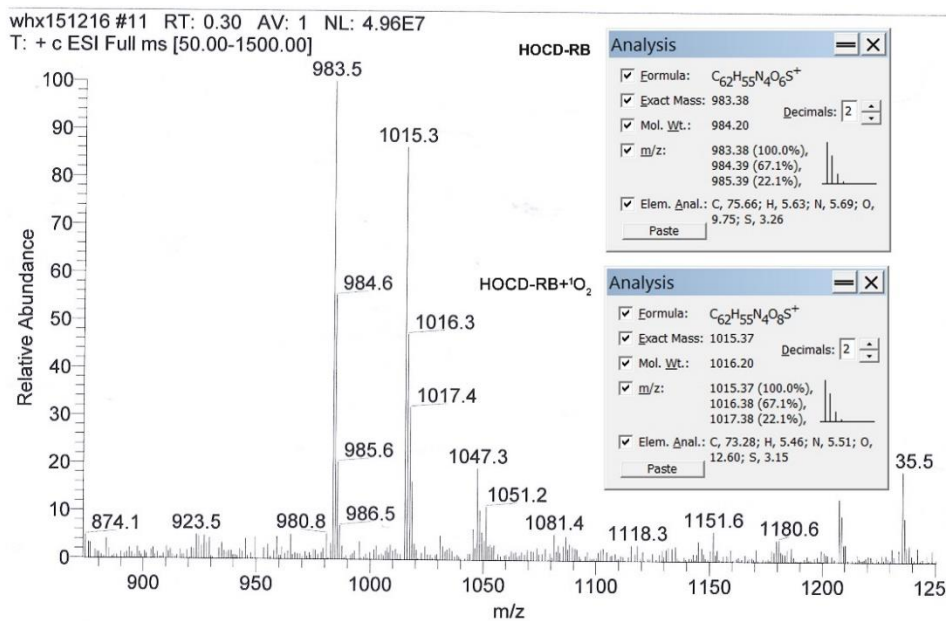

**Figure S3.** ESI-MS of endoperoxide obtained from the reaction of HOCD-RB with  $^1\text{O}_2$  in 10 mM PBS buffer (pH 7.4).

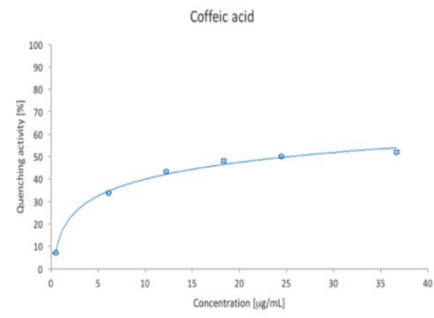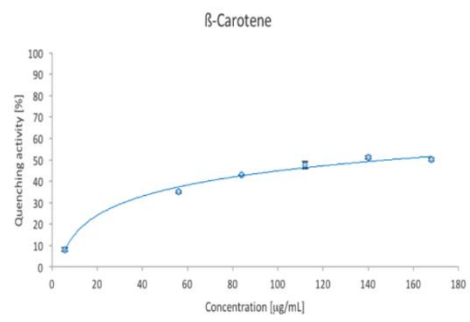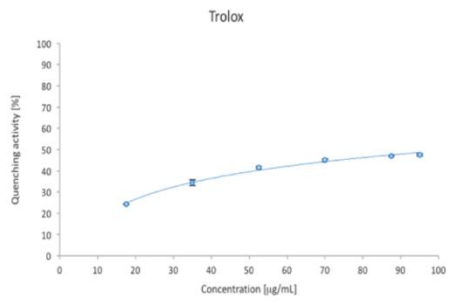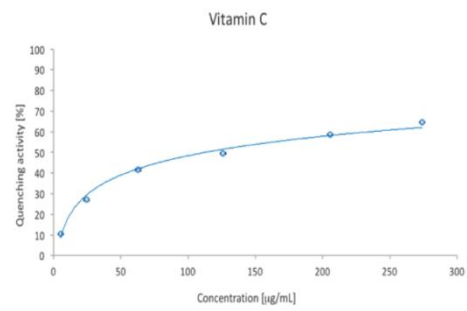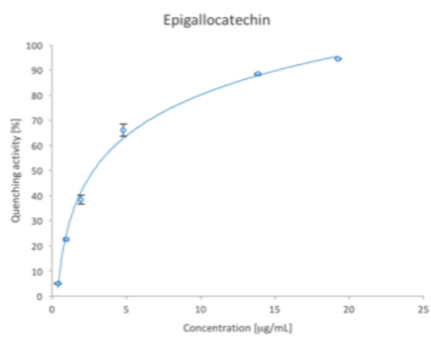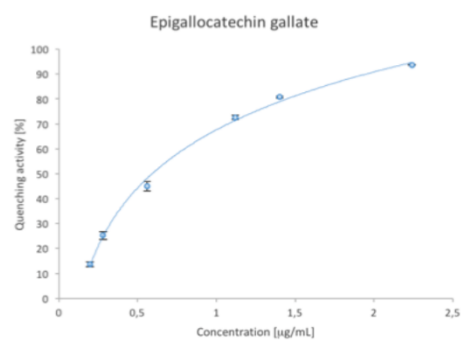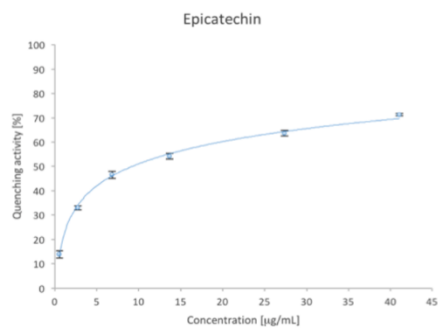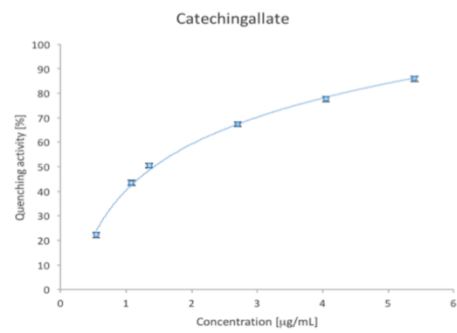

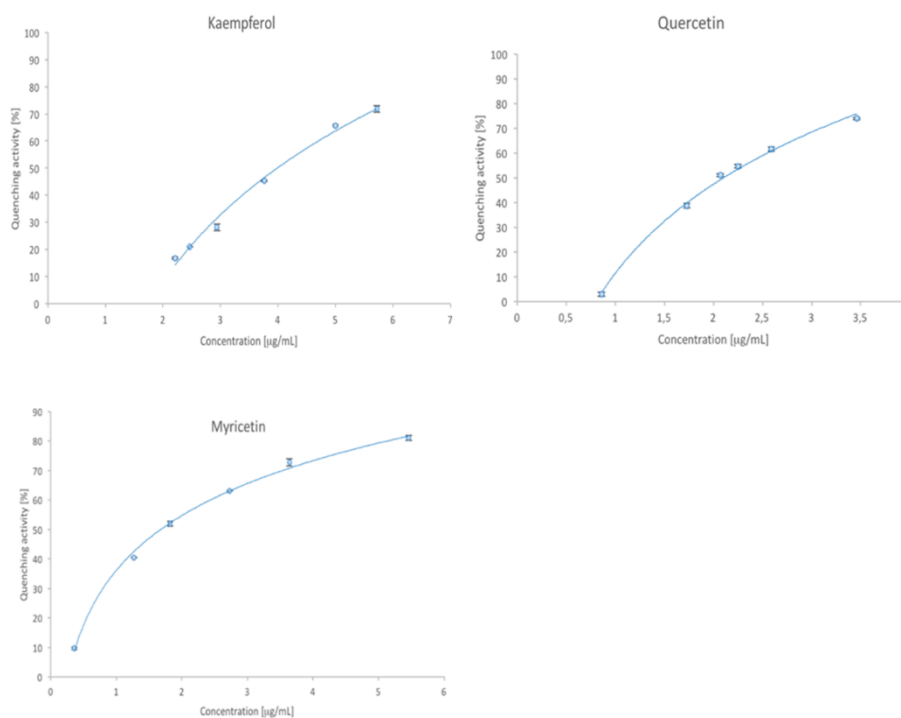

**Figure S4.** Dose response curves of antioxidants. Error bars represent means ( $n=3$ )  $\pm$  standard deviation.

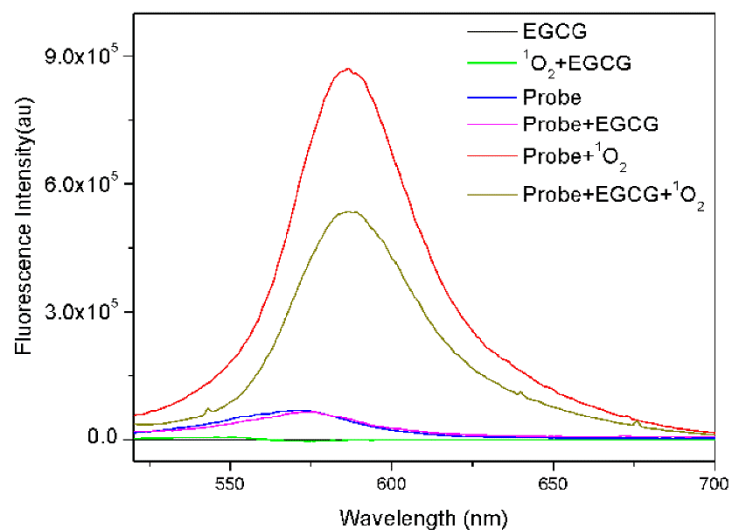

**Figure S5.** The fluorescence emission spectra of samples consist of ECGC with or without  $^1\text{O}_2$  or probe in 100 mM PBS buffer (pH 6.8,  $\lambda_{\text{ex}} = 500$  nm).

**Table S2.** Synergistic effects of flavonoids mixture (1:1 molar ratio), n=3.

| Mixture (1:1) | SE                      | Effect       |
|---------------|-------------------------|--------------|
| EGCG + K      | 0.66 ±0.04              | Antagonistic |
| EGCG + Q      | 0.82 ±0.02              | Antagonistic |
| EGCG + M      | 0.45 ±0.05              | Antagonistic |
| CG + K        | 1.18 ±0.05              | Synergistic  |
| CG + Q        | 0.87 ±0.06 <sup>a</sup> | Additive     |
| CG + M        | 0.94 ±0.03 <sup>a</sup> | Additive     |
| EGC + K       | 0.67 ±0.01              | Antagonistic |
| EGC + Q       | 0.71 ±0.07              | Antagonistic |
| EGC + M       | 0.77 ±0.03              | Antagonistic |
| EC + K        | 0.71 ±0.02              | Antagonistic |
| EC + Q        | 0.80 ±0.04              | Antagonistic |
| EC + M        | 0.71 ±0.02              | Antagonistic |

<sup>a</sup> No significant difference between experimental and theoretical quenching value  $p < 0.01$ .

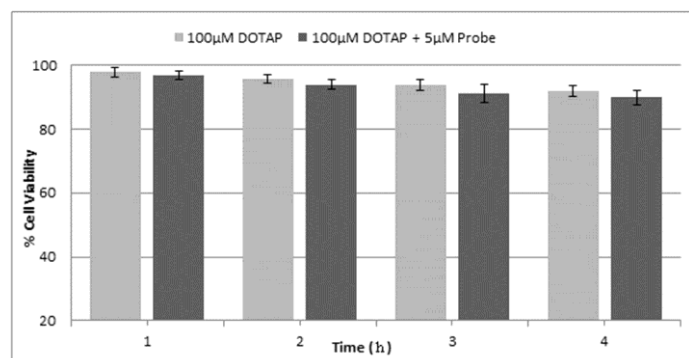

**Figure S6.** Cytotoxicity effects of HOCD-RB-DOTAP treatment on RAW 264.7 cells. RAW 264.7 cells were treated with 5  $\mu$ M probe + 100  $\mu$ M DOTAP mixture or 100  $\mu$ M DOTAP alone for 4 h, the cell viability was measured using MTT assay. Data were presented as mean  $\pm$  SDE of 3 independent experiments.

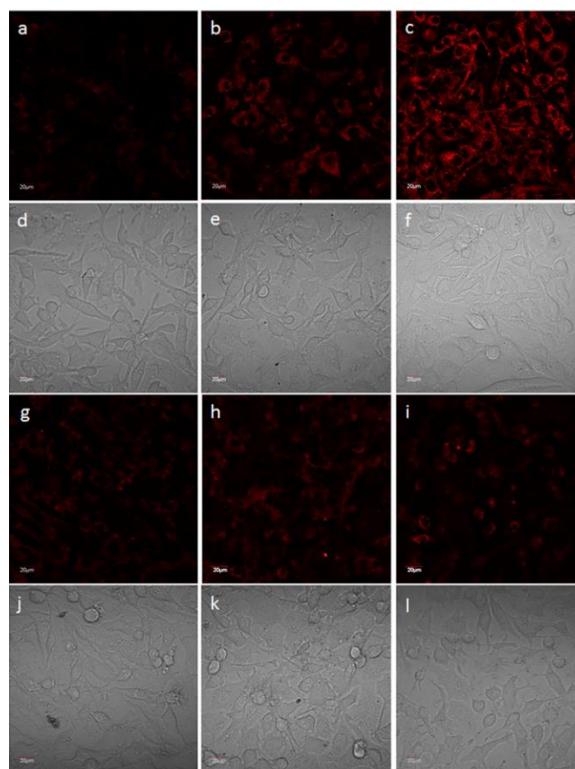

**Figure S7.** The 2D fluorescent images of cells treated with HOCD-RB (5  $\mu$ M) for 30 min. (a) HOCD-RB alone as control, that is non-stimulated with PMA; (b) and (c) stimulated with PMA (5 and 10  $\mu$ M); (g) histidine (400  $\mu$ M) pre-treatment followed by PMA stimulation (10  $\mu$ M); (h) EGC (100  $\mu$ M) pre-treatment followed by PMA stimulation (10  $\mu$ M); (i) EGCG (100  $\mu$ M) pre-treatment followed by PMA stimulation. d-f and j-l are corresponding DIC images.



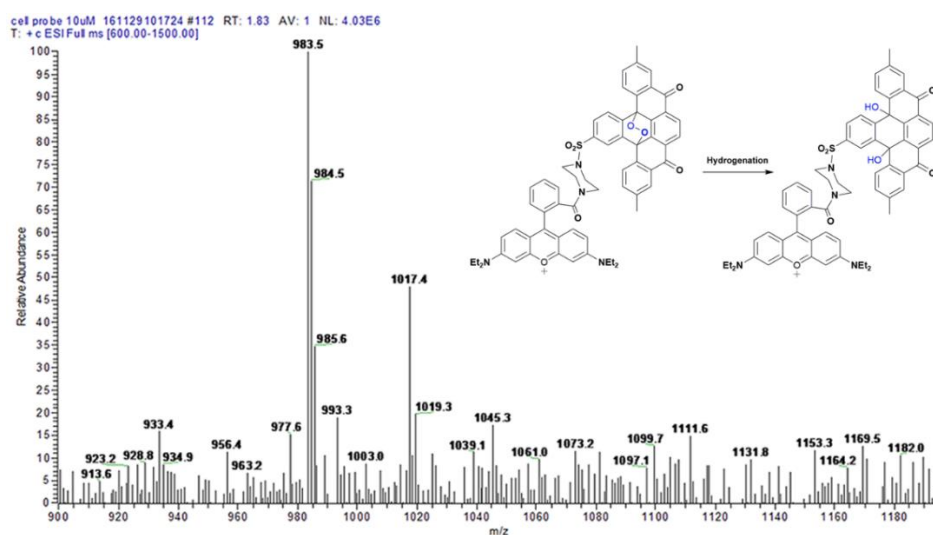

**Figure S8.** ESI-MS of the products obtained from HOCD-RB reacted with  $^1\text{O}_2$  in cells.

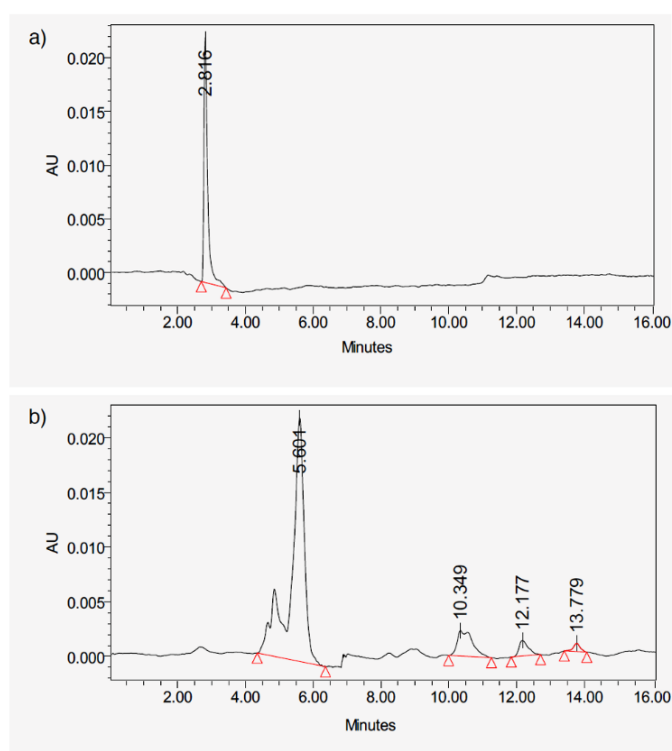

**Figure S9.** HPLC spectra of EGCG with rose Bengal before (a) and after (b) irradiation.

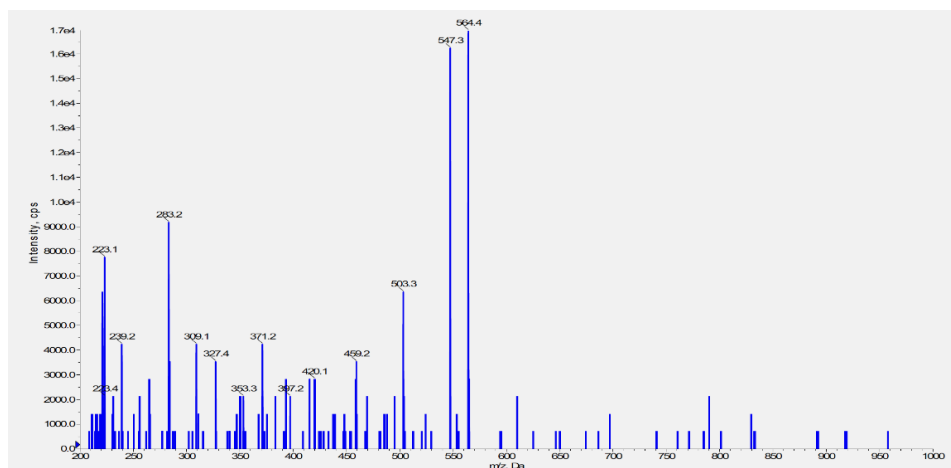

**Figure S10.** LC-MS/MS spectrum of oxidation product of EGCG with the retention time at 13.78 min and  $m/z$  564.4.

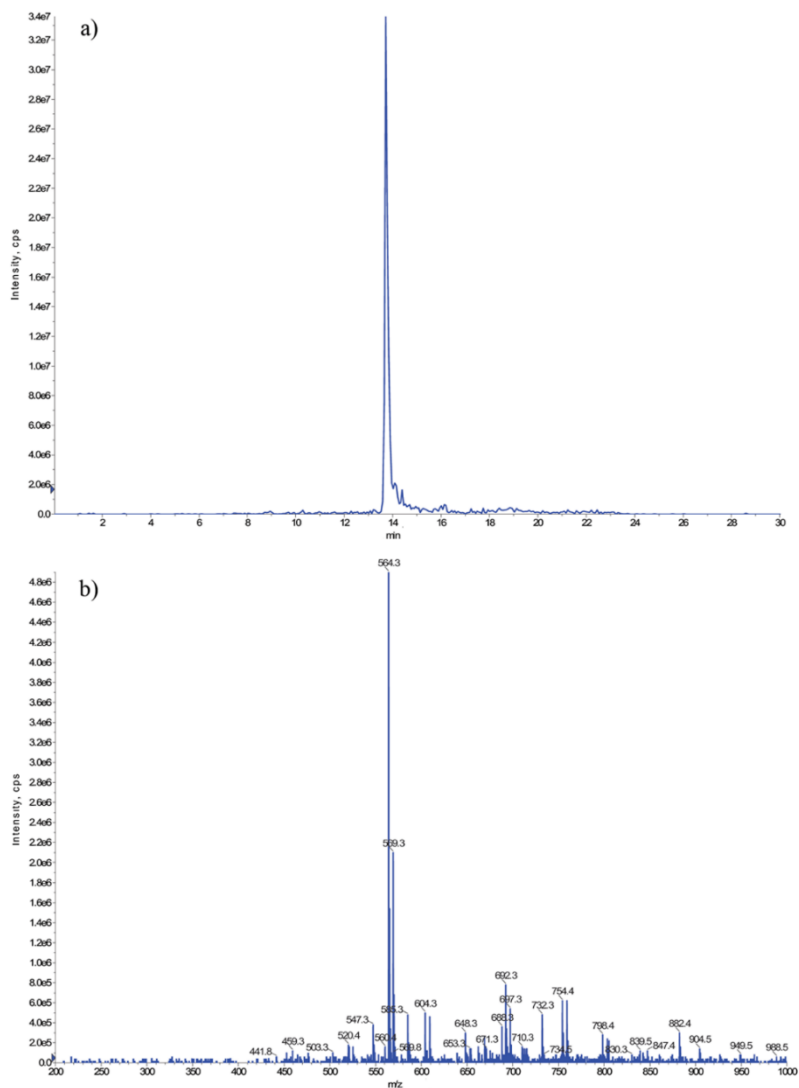

**Figure S11.** Theaflavine standard LC chromatogram (a) and mass spectrum (b).
